# Supplementary material for: Identification of Novel Immune-infiltration Related miRNAs that can Predict the Prognosis of Patients with Hepatocellular Carcinoma
Source: Research Square preprint supplement (doi:10.21203/rs.3.rs-1263474/v1), 2022-02-17
Supplement: Supplementary file 1 [file 1ac1b87d1861f1a02a3edfaa.xlsx]

## Sheet: Differential expression
miRNAs	logFC	logCPM	PValue	FDR
hsa-mir-4746	1.30144	10.7989	8.95505e-12	1.05187e-09
hsa-mir-1266	0.849949	11.0389	3.21984e-08	1.58603e-06
hsa-mir-3200	1.01026	10.7409	9.02744e-08	3.72565e-06
hsa-mir-187	-0.856632	10.5873	1.41266e-06	4.68943e-05
hsa-mir-4661	0.688702	11.0225	5.07133e-06	0.000133516
hsa-mir-877	0.88591	10.6248	1.20174e-05	0.000278039
hsa-mir-3677	0.654907	10.9346	3.64649e-05	0.000687431
hsa-mir-1180	0.443941	11.4874	7.48622e-05	0.00120331
hsa-mir-137	1.57053	10.1295	9.06281e-05	0.0013461
hsa-mir-760	1.01357	10.2921	0.000143371	0.00185532
hsa-mir-1226	0.817439	10.4519	0.000267821	0.0033249
hsa-mir-3189	1.22425	10.0679	0.000717942	0.00707289
hsa-mir-1301	0.417171	11.2627	0.000771077	0.00745211
hsa-mir-6844	1.1559	10.0472	0.000805659	0.00768661
hsa-mir-937	0.624375	10.6736	0.000858749	0.00799579
hsa-mir-222	0.334785	11.624	0.00098548	0.00890431
hsa-mir-3127	0.529076	10.8206	0.00162448	0.0134814
hsa-mir-18a	0.352183	11.4578	0.00208839	0.016438
hsa-mir-301a	0.385352	11.2028	0.00319555	0.0234734

## Sheet: Pearson correlation analysis
Pearson correlation coefficient of 19 immune- and prognosis-related miRNAs with T cells regulatory (Tregs) with p < 0.05
Immune cell	miRNAs	Pearson correlation	Pearson P
T cells regulatory (Tregs)	hsa-mir-6844	0.333035	4.93288e-11
T cells regulatory (Tregs)	hsa-mir-3189	0.329765	7.79374e-11
T cells regulatory (Tregs)	hsa-mir-877	0.326017	1.30792e-10
T cells regulatory (Tregs)	hsa-mir-1180	0.306447	1.7427e-09
T cells regulatory (Tregs)	hsa-mir-18a	0.299486	4.18621e-09
T cells regulatory (Tregs)	hsa-mir-3677	0.297056	5.65365e-09
T cells regulatory (Tregs)	hsa-mir-301a	0.277727	5.59384e-08
T cells regulatory (Tregs)	hsa-mir-1226	0.276332	6.55582e-08
T cells regulatory (Tregs)	hsa-mir-3200	0.263573	2.68937e-07
T cells regulatory (Tregs)	hsa-mir-937	0.256255	5.84849e-07
T cells regulatory (Tregs)	hsa-mir-760	0.252115	8.98338e-07
T cells regulatory (Tregs)	hsa-mir-1301	0.24961	1.16049e-06
T cells regulatory (Tregs)	hsa-mir-137	0.247786	1.39587e-06
T cells regulatory (Tregs)	hsa-mir-4661	0.246797	1.54202e-06
T cells regulatory (Tregs)	hsa-mir-1266	0.234684	5.04653e-06
T cells regulatory (Tregs)	hsa-mir-4746	0.216043	2.77483e-05
T cells regulatory (Tregs)	hsa-mir-3127	0.214067	3.29632e-05
T cells regulatory (Tregs)	hsa-mir-187	0.213037	3.60401e-05
T cells regulatory (Tregs)	hsa-mir-222	0.207707	5.67833e-05

## Sheet: Univariate Cox regression
miRNA	COX coefficients	COX HR	COX P value	95%CI lower	95%CI upper	COX concordance
hsa-mir-3677	0.302423	1.35313	8.51092e-05	1.16367	1.57344	0.618581
hsa-mir-3127	0.3883	1.47447	0.000166239	1.20465	1.80474	0.589522
hsa-mir-137	0.254022	1.2892	0.000451004	1.11863	1.48577	0.548654
hsa-mir-3189	0.40244	1.49547	0.000928764	1.17849	1.89771	0.564538
hsa-mir-1180	0.202508	1.22447	0.00148833	1.08066	1.38741	0.585981
hsa-mir-301a	0.25231	1.28699	0.00152596	1.10108	1.50429	0.555906
hsa-mir-187	0.152385	1.16461	0.00180905	1.05829	1.28161	0.575604
hsa-mir-760	0.406554	1.50163	0.00191523	1.16156	1.94127	0.568495
hsa-mir-4661	0.208027	1.23125	0.00223383	1.07752	1.4069	0.577258
hsa-mir-1226	0.246282	1.27926	0.00956334	1.06183	1.54121	0.556583
hsa-mir-877	0.23079	1.25959	0.0107526	1.0549	1.50401	0.566517
hsa-mir-3200	0.15679	1.16975	0.0113559	1.03604	1.32072	0.576463
hsa-mir-1266	0.162205	1.1761	0.0160983	1.03057	1.34219	0.541845
hsa-mir-6844	0.383192	1.46696	0.0271798	1.04413	2.06101	0.536754
hsa-mir-18a	0.138455	1.1485	0.0272931	1.01564	1.29874	0.550932
hsa-mir-1301	0.173319	1.18925	0.029324	1.01758	1.38987	0.549552
hsa-mir-937	0.170624	1.18604	0.029978	1.01668	1.38362	0.544917
hsa-mir-222	0.16558	1.18008	0.0320437	1.0143	1.37294	0.557572
hsa-mir-4746	0.154913	1.16756	0.0479325	1.00141	1.36127	0.561439
