# Supplementary material for: Identification of Novel Immune-infiltration Related miRNAs that can Predict the Prognosis of Patients with Hepatocellular Carcinoma
Source: Research Square preprint supplement (doi:10.21203/rs.3.rs-1263474/v1), 2022-02-17
Supplement: Supplementary file 2 [file 8522fad002855ce4f615c306.xlsx]

## Sheet: 19 miRNA degrees in network
The degrees of the 19 miRNAs in the miRNA-target interaction network.
miRNAs	Network degrees
hsa-miR-18a	262
hsa-miR-877	235
hsa-miR-760	194
hsa-miR-137	149
hsa-miR-6844	111
hsa-miR-1266	95
hsa-miR-187	84
hsa-miR-222	83
hsa-miR-937	83
hsa-miR-1226	81
hsa-miR-301a	68
hsa-miR-3127	64
hsa-miR-3189	61
hsa-miR-3200	56
hsa-miR-3677	54
hsa-miR-1180	53
hsa-miR-1301	36
hsa-miR-4661	20
hsa-miR-4746	10
